# Supplementary material for: Conjugation to a SMAC mimetic potentiates sigma-2 ligand induced tumor cell death in ovarian cancer
Source: PubMed Central journal article supplement (PMC4015918; doi:10.1186/1476-4598-13-50), 2014-03-07
Supplement: 1476-4598-13-50-S1.pdf [file 1476-4598-13-50-S1.pdf]

# Supplementary Table S1

| Compound         | $K_i$ (nM) <sup>a</sup> |                      | Sigma-1/Sigma-2 <sup>d</sup> |
|------------------|-------------------------|----------------------|------------------------------|
|                  | Sigma-1 <sup>b</sup>    | Sigma-2 <sup>c</sup> |                              |
| <b>SW43</b>      | 134.3 ± 11.9            | 7.1 ± 1.3            | 19                           |
| <b>SW IV-134</b> | 5737 ± 476              | 22.6 ± 1.8           | 253                          |

**Table S1. Binding Affinities for Sigma-1 and Sigma-2 Receptors.** The sigma-1 and sigma-2 receptor binding affinities of **SW IV-134** were determined as previously described ([22](#)). For details see also the Materials and Methods section.

<sup>a</sup> Mean ± S.E.M.  $K_i$  values were determined by at least three experiments.

<sup>b</sup>  $K_i$  for inhibiting the binding of [<sup>3</sup>H](+)-pentazocine to guinea pig brain homogenates.

<sup>c</sup>  $K_i$  for inhibiting the binding of [<sup>3</sup>H](+)-**DTG** to rat liver homogenates.

<sup>d</sup>  $K_i$  for sigma-1 receptors/  $K_i$  for sigma-2 receptors.
