# Supplementary material for: Conjugation to a SMAC mimetic potentiates sigma-2 ligand induced tumor cell death in ovarian cancer
Source: PubMed Central journal article supplement (PMC4015918; doi:10.1186/1476-4598-13-50), 2014-03-07

Supplementary Figure S4

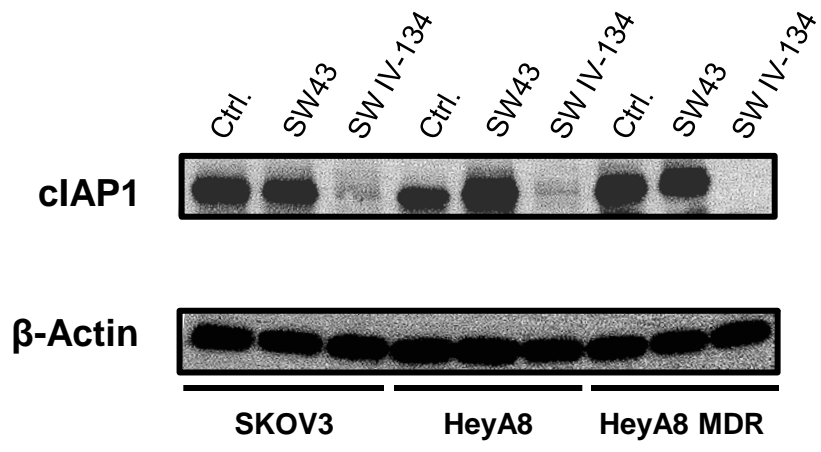

Supplement: 1476-4598-13-50-S5.pdf [file 1476-4598-13-50-S5.pdf]
